# Supplementary material
Source: PubMed Central journal article supplement (PMC11488487)
Supplement: ehp14378.smcontents.508.pdf [file ehp14378.smcontents.508.pdf]

**Note to readers with disabilities:** *EHP* strives to ensure that all journal content is accessible to all readers. However, some figures and Supplemental Material published in *EHP* articles may not conform to [508 standards](#) due to the complexity of the information being presented. If you need assistance accessing journal content, please contact [ehpsubmissions@niehs.nih.gov](mailto:ehpsubmissions@niehs.nih.gov). Our staff will work with you to assess and meet your accessibility needs within 3 working days.

### **Supplemental Material**

#### **Cross-Sectional Examination of Thyroid Hormones and Environmental Exposure to Multiclass Pesticides in Women of Reproductive Age in China**

Feng-Jiao Peng, Paul Palazzi, Sakina Mezzache, Emilie Adelin, Nasrine Bourokba, Philippe Bastien, and Brice M.R. Appenzeller

#### **Table of Contents**

**Figure S1.** Spearman correlation coefficients between exposure biomarkers among 196 healthy Chinese women of reproductive age. The color intensity indicates the magnitude of the correlation. Blue indicates a positive correlation, while red indicates a negative correlation.

**Figure S2.** Percent differences in hair rT3/T4 molar ratio per 2-SD increase in log10-transformed pollutant (continuous variable; blue circle symbol) concentration or detect versus nondetect (binary variable; dark blue square) in the multi-pollutant Lasso model (A) or in the subsequent multi-pollutant OLS model (B) on the pollutants stably selected by the Lasso model among 196 healthy Chinese women of reproductive age. Models were adjusted for age, body mass index (BMI) and city. Symbols in the plot B represent average percent differences and lines represent 95% confidence intervals. Numerical values are reported in Excel Tables S6 and S8.

**Figure S3.** Percent differences in hair rT3/T3 molar ratio per 2-SD increase in log10-transformed pollutant (continuous variable; blue circle symbol) concentration or detect versus nondetect (binary variable; dark blue square) in the multi-pollutant Lasso model (A) or in the subsequent multi-pollutant OLS model (B) on the pollutants stably selected by the Lasso model among 196 healthy Chinese women of reproductive age. Models were adjusted for age, body mass index (BMI) and city. Symbols in the plot B represent average percent differences and lines represent 95% confidence intervals. Numerical values are reported in Excel Tables S6 and S8.

**Additional File-** Excel Document
